# Supplementary material for: First Detection of Human ST131-CTX-M-15-O25-B2 Clone and High-Risk Clonal Lineages of ESBL/pAmpC-Producing E. coli Isolates from Diarrheic Poultry in Tunisia
Source: MDPI journal article supplement (doi:10.3390/antibiotics10060670), 2021-06-04
Supplement: s1 [file s1]

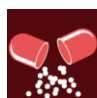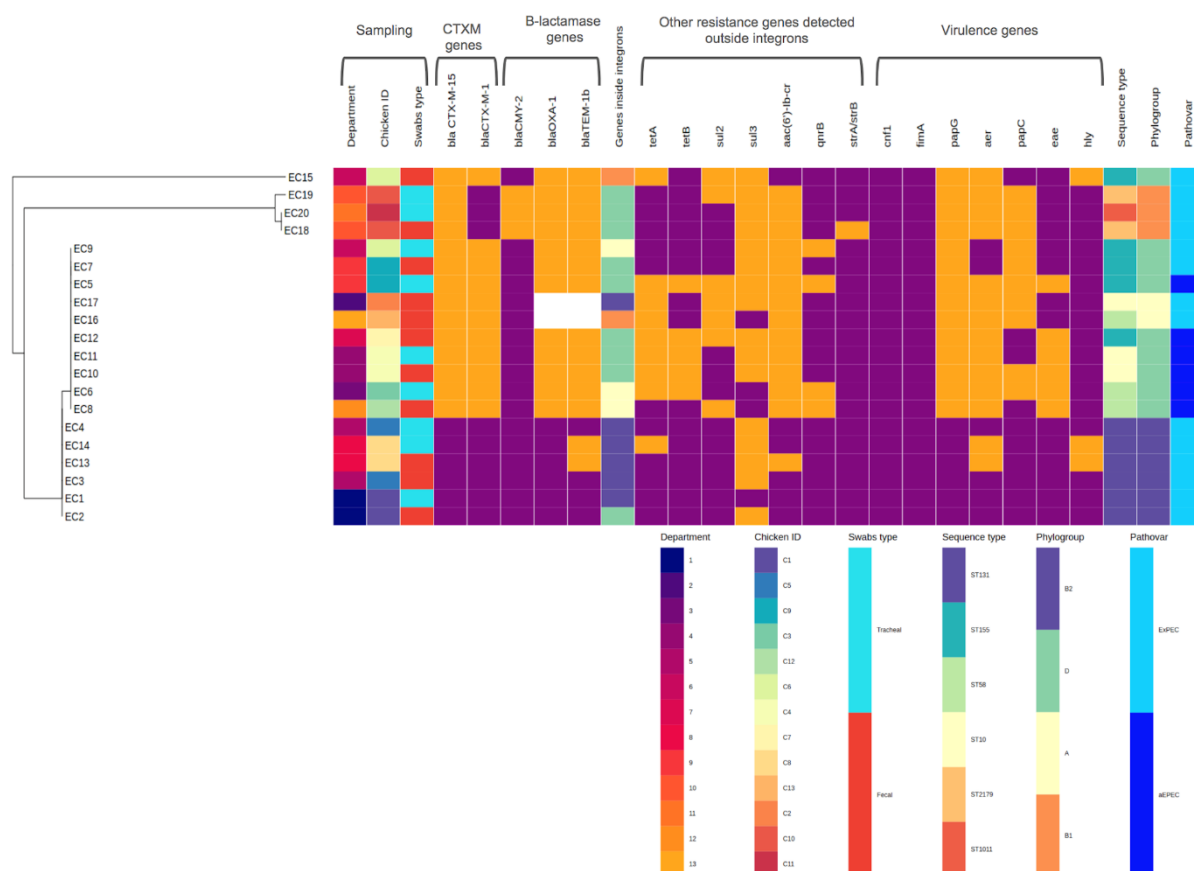

**Figure S1.** Clustering analysis of genetic variation and clonal diversity of 20 ESBL/AmpC producing *E. coli* isolates recovered from fecal and tracheal samples of diarrheic chicken farm in Tunisia. Chicken ID: chicken identified.
